# Supplementary material for: Analysis of neurochemicals by capillary electrophoresis in athletes' urine and a pilot study of their changes responding to sport fatigue
Source: Royal Society of Chemistry journal article supplement (doi:10.1039/c9ay00457b), 2019-01-01
Supplement: c9ay00457b1.pdf [file c9ay00457b1.pdf]

## SUPPORTING INFORMATION

# **Analysis of neurochemicals by capillary electrophoresis in athlete's urine and a pilot study of their changes responding to sport fatigue**

Shuai Ma <sup>a</sup>; Zhongqi Xu <sup>a,\*</sup>; Jie Ren <sup>b,\*</sup>

<sup>a</sup>College of Chemistry, Chemical Engineering and Biotechnology, Donghua University, Shanghai 201620, China

<sup>b</sup>China Table Tennis College, Shanghai University of Sport, Shanghai 200438, China

## **Figure Captions**

**Fig. S1.** Electropherograms of 11 mixtures at different BGE pH .

**Fig. S2.** Electropherograms of 11 mixtures at different separation voltage.

**Fig. S3.** Electropherograms of 11 mixtures at different injection time.

## **Table Legend**

**Table. S1.** Representative neurochemicals and their physicochemical characteristics

**Table. S2.** Comparison of this method with the reported methods for determination of the target neurochemicals in urine samples.

**Table. S3.** Under the different physiological conditions, changes in the content of six neurochemicals

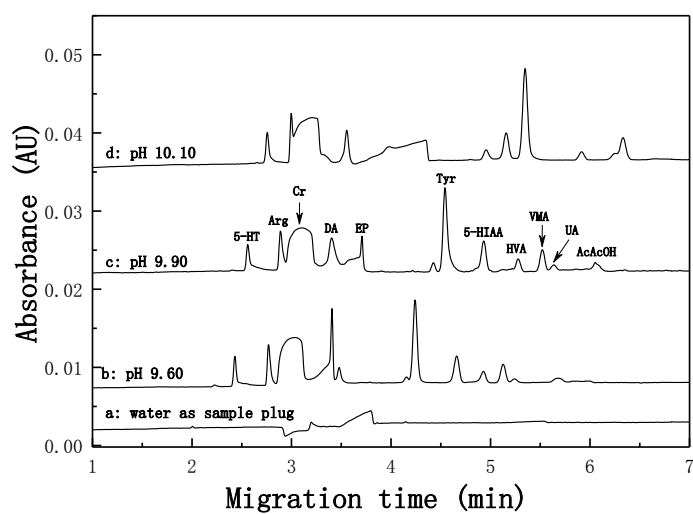

**Fig. S1.** Electropherograms of 11 mixtures at different BGE pH . BGE was 12.5 mmol/L  $\text{Na}_2\text{B}_4\text{O}_7$ , whose pH was adjusted by 0.1mo l /L NaOH. The concentrations of 5-HT, Arg, Cre, DA, EP, Tyr, 5-HIAA, HVA, VMA, UA, AcAcOH were at 10.0, 50.0, 120.0, 10.0, 5.0, 20.0, 8.0, 2.0, 5.0, 1.5, 100.0  $\mu\text{mol/ L}$ , respectively. Detection wavelength: 200 nm. Injection: 0.5 psi at 20 s. Separation voltage: +25 kV.

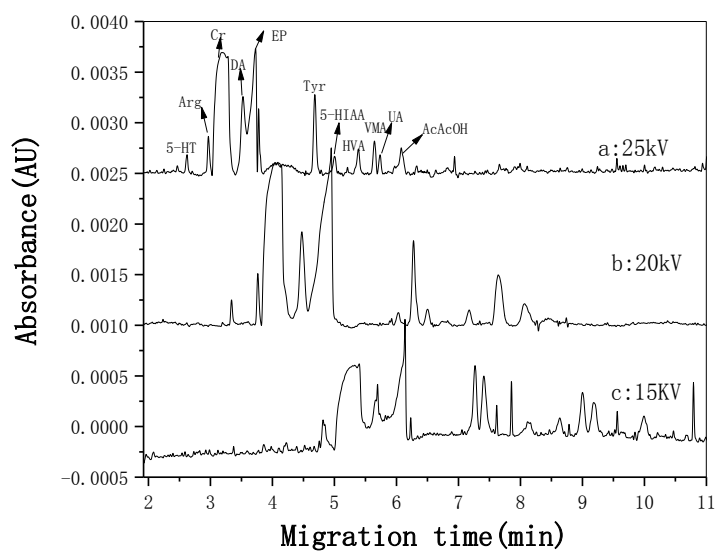

**Fig. S2.** Electropherograms of 11 mixtures at different separation voltage. BGE was 12.5 mmol / L  $\text{Na}_2\text{B}_4\text{O}_7$ , pH : 9.90. (a) 25 kV, (b) 20 kV, (c) 15 kV. The concentrations of 5-HT, Arg, Cre, DA, EP, Tyr, 5-HIAA, HVA, VMA, UA, AcAcOH were at 0.8, 4.0, 75.0, 2.7,1.2, 1.6, 0.6, 0.16, 0.4, 0.64, 1.6  $\mu\text{mol}/\text{L}$ , respectively. Detection wavelength: 200 nm. Injection: 0.5 psi at 20 s. Separation voltage: +25 kV.

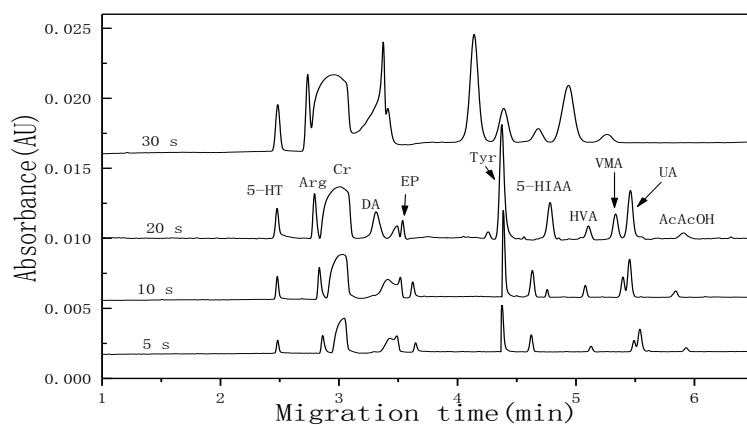

**Fig.S3** Electropherograms of 11 mixtures at different injection time. Injection: 0.5 psi from 5 s to 30s. BGE was 12.5 mmol/L  $\text{Na}_2\text{B}_4\text{O}_7$ , pH = 9.9. The concentrations of 5-HT, Arg, Cre, DA, EP, Tyr, 5-HIAA, HVA, VMA, UA, AcAcOH were at 10.0, 50.0, 120.0, 10.0, 5.0, 20.0, 8.0, 2.0, 5.0, 1.5, 100.0  $\mu\text{mol/L}$ . respectively. Other conditions are were as described in optimization of CE conditions.

**Table. S1. Representative neurochemicals and their physicochemical characteristics**

| Neurochemicals                            | Structures                                                                          | Molar mass<br>(g/mol) | pK a*          |
|-------------------------------------------|-------------------------------------------------------------------------------------|-----------------------|----------------|
| Arginine (Arg)                            | 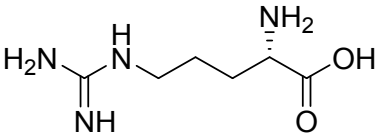   | 174.2                 | 2.17;9.04;12.5 |
| Tyrosine (Tyr)                            |    | 181.19                | 5.65           |
| Serotonin (5-HT)                          |    | 212.68                | 9.8;11.1       |
| Dopamine (DA)                             |   | 153.18                | 8.9;10.6;13.1  |
| Epinephrine (EP)                          |  | 183.2                 | 8.66;9.95      |
| 5-hydroxy-3-indoleacetic acid<br>(5-HIAA) |  | 191.18                | ND*            |
| Homovanillic acid<br>(HVA)                |  | 182.17                | 4.41;10.52     |
| vanilla mandelic<br>acid (VMA)            |  | 198.17                | 3.41           |
| Creatinine(Cre)                           |  | 113.12                | 4.84;9.20      |

**Table. S1. Representative neurochemicals and their physicochemical characteristics**

| Neurochemicals           | Structures                                                                        | Molar mass<br>(g /mol ) | pK a*          |
|--------------------------|-----------------------------------------------------------------------------------|-------------------------|----------------|
| Uric acid(UA)            | 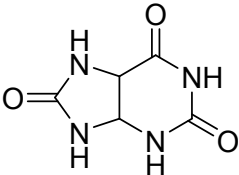 | 168.11                  | 3.89;5.75;10.3 |
| Acetoacetic acid(AcAcOH) |  | 118.09                  | 3.58           |

pKa\* values obtained from chemicalize.com; ND\* = Not defined

**Table S2****Comparison of this method with the reported methods for determination of the target neurochemicals in urine samples.**

| Analytical methods | Analytes                                                                       | LODs<br>(ng/mL)             | Refs. |
|--------------------|--------------------------------------------------------------------------------|-----------------------------|-------|
| GC-MS/MS           | Tyr, Trp, Glu                                                                  | 0.02 ~ 11.10                | [31]  |
| GC-MS              | DOPAC, VMA, DOMA                                                               | 0.02 ~ 4.7                  | [32]  |
| GC-MS/MS-MRM       | HVA, MHPG, DOPAC,<br>VMA, 5-HIAA, DA                                           | 0.17 ~ 0.60                 | [33]  |
| GC-MS              | HVA, DOPAC, DA,<br>VMA, NMN, NEP, EP,<br>L-DOPA,                               | 0.05 ~ 6.24                 | [34]  |
| CE-UV              | HA, Cad, PEA, TA<br>Try, DA, 5-HT                                              | 61-411                      | [38]  |
| CE-LINF            | TA, 5-HT, DA, E,<br>VMA, 5-HIAA                                                | $2.33 \times 10^{-3}$ -3.92 | [39]  |
| tITP-CZE           | DA, TA,<br>Try, 5-HT                                                           | 4.41-11.48                  | [40]  |
| MEKC-LIF           | Cad, His,<br>Spd, Tyr                                                          | 111.15-1741                 | [44]  |
| MEKC-LIF           | 1,6-Diaminohexane, 2-<br>phenylethylamine, Cad,<br>His, Put, Spd, Spm, TA, Tyr | 0.0735-48.57                | [46]  |



---

|         |                                             |               |              |
|---------|---------------------------------------------|---------------|--------------|
| CZE-LIF | 5-HT, DA,<br>DOPA, E, NE                    | 0.0918-0.2693 | [47]         |
| CE-UV   | TA, 5-HT , 3-MT<br>HMBA , NMN, DA           | 4.307-31.248  | [48]         |
|         | Trp, 5-HIAA, VMA                            |               |              |
|         | 5-HT, Arg, Cre                              | 0.504-169.68  |              |
| CE-UV   | DA, EP, Tyr<br>5-HIAA,HVA,VMA<br>UA, AcAcOH |               | In this work |

---

**Table. S3. Under the different physiological conditions, changes in the content of six neurochemicals**

| Volunteer information                               |         | Biomarker compounds          |                             |                            |                              |                              |                           |      |
|-----------------------------------------------------|---------|------------------------------|-----------------------------|----------------------------|------------------------------|------------------------------|---------------------------|------|
| (age(Y, year), mental<br>physiology , RPE<br>value) |         | Arg<br>( $\mu\text{mol/L}$ ) | DA<br>( $\mu\text{mol/L}$ ) | Cre<br>( $\text{mmol/L}$ ) | HVA<br>( $\mu\text{mol/L}$ ) | VMA<br>( $\mu\text{mol/L}$ ) | UA<br>( $\text{mmol/L}$ ) |      |
| NO.1                                                | normal  | 6                            | 477.2                       | 27.35                      | 8.84                         | 72.75                        | 95.65                     | 0.44 |
|                                                     | fatigue | 18                           | 281.2                       | NF                         | 8.41                         | 74.60                        | 58.30                     | 0.39 |
|                                                     | relaxed | 14                           | 423.0                       | 25.35                      | 10.76                        | 51.60                        | 84.85                     | 0.39 |
| NO.2                                                | normal  | 11                           | 285.4                       | 15.65                      | 7.43                         | 51.10                        | 37.80                     | 0.55 |
|                                                     | fatigue | 19                           | 210.2                       | 14.25                      | 7.83                         | 55.05                        | 49.90                     | 0.67 |
|                                                     | relaxed | 10                           | 277.5                       | 23.55                      | 8.48                         | 64.40                        | 78.05                     | 0.52 |
| NO.3                                                | normal  | 13                           | 294.0                       | 20.85                      | 12.36                        | 48.60                        | 95.05                     | 1.02 |
|                                                     | fatigue | 18                           | 111.2                       | 17.30                      | 5.04                         | 65.30                        | 144.7                     | 0.59 |
|                                                     | relaxed | 15                           | 247.0                       | 13.35                      | 11.89                        | 39.10                        | 98.60                     | 0.34 |
| NO.4                                                | normal  | 12                           | 208.6                       | 18.00                      | 9.74                         | 29.15                        | 67.90                     | 1.01 |
|                                                     | fatigue | 18                           | 109.7                       | 13.75                      | 6.77                         | 31.95                        | 56.55                     | 0.61 |
|                                                     | relaxed | 17                           | 105.8                       | 13.55                      | 6.68                         | NF                           | 56.15                     | 0.72 |
| NO.5                                                | normal  | 7                            | 124.4                       | 16.40                      | 9.68                         | 27.60                        | 73.95                     | 1.00 |
|                                                     | fatigue | 14                           | 111.2                       | 19.70                      | 7.61                         | 28.40                        | 74.20                     | 0.36 |
|                                                     | relaxed | 9                            | 174.6                       | 22.35                      | 7.04                         | 30.70                        | 69.95                     | 0.59 |
